# Supplementary material for: Phosphorylation of p23-1 cochaperone by protein kinase CK2 affects root development in Arabidopsis
Source: PubMed Central journal article supplement (PMC6614504; doi:10.1038/s41598-019-46327-0), 2019-07-08
Supplement: 41598_2019_46327_MOESM1_ESM.pdf [file 41598_2019_46327_MOESM1_ESM.pdf]

**Phosphorylation of p23-1 co-chaperone by protein kinase CK2 affects root development in *Arabidopsis***

Stefano D'Alessandro, Serena Golin, Sofia Zanin, Laura Cendron, Michela Zottini and Maria Ruzzene

Supplementary information

## Quantitative Real Time PCR

|         |                        |
|---------|------------------------|
| HSP90.2 | ACTCACCGTGCTGTCTTGTA   |
| HSP90.2 | GAGGAGAAGCACAAGGTCCT   |
| CK2A1   | GTTACTGTGCGCCGTCTTAG   |
| CK2A1   | AACCGGAAACTTCCGAGACA   |
| CK2A2   | TCTTCGACGGTACCTGTTGTT  |
| CK2A2   | TCAACGGTTCCGGTGTGAC    |
| CK2A3   | TCTCGTTGTTCAATGGGGTCA  |
| CK2A3   | ACGCAACGCTCATTGATTG    |
| CK2A1   | TGATCCACAACCTGGAAGCACT |
| CK2A1   | ATCAATCGCCTCGGGTGAAG   |
| CK2A2   | TGACAACCAGGATCAGCTCG   |
| CK2A2   | AGGCTTCCTGCTATGTCTCC   |
| CK2A3   | GGTCTCACCTGAGGCAATTGAT |
| CK2A3   | TGCTCTCTGCGGCTTTAACT   |
| ACT2    | CATTCCAGCAGATGTGGATCTC |
| ACT2    | ACCCAGCTTTTTAAGCCTTTG  |

## Cloning

|           |                                 |
|-----------|---------------------------------|
| At3g03773 | CATGCATATGAGTCGTAATCCGGAGGTTCTT |
| At3g03773 | CATGCATATGCTACTTGTCTTGCCTTTTCCA |
| At4g02450 | CATGCATATGATGAGTCGTATCCTGA      |
| At4g02450 | CATGCTCGAGTCACTTGTCTTCTTAAC     |

## Point mutagenesis

|           |                                  |                                 |
|-----------|----------------------------------|---------------------------------|
| At4g02450 | GGAAGAGTTTGAAGACGCTGATGATGAAGAAG | point mutation S ->A            |
| At4g02450 | GGAAGAGTTTGAAGACGAGGATGATGAAGAAG | point mutation A -> E or S -> E |
|           |                                  |                                 |
